# Supplementary material for: Identifying and prioritizing potential human-infecting viruses from their genome sequences
Source: PubMed Central journal article supplement (PMC8478193; doi:10.1371/journal.pbio.3001390), 2021-09-28

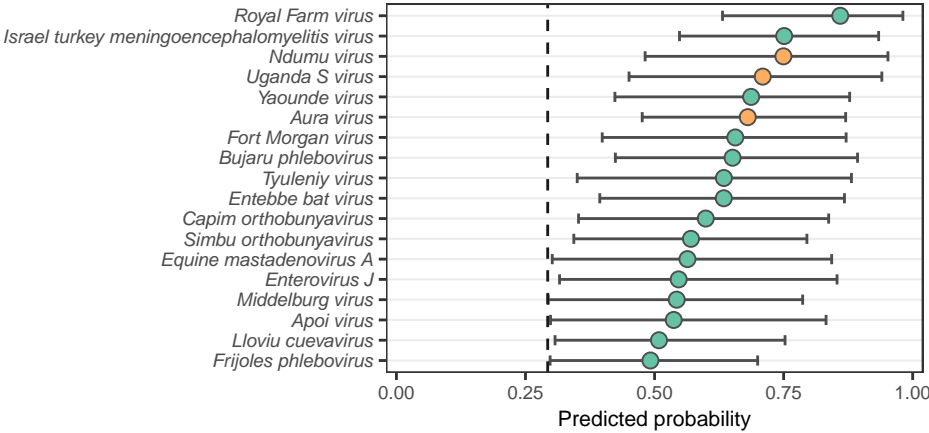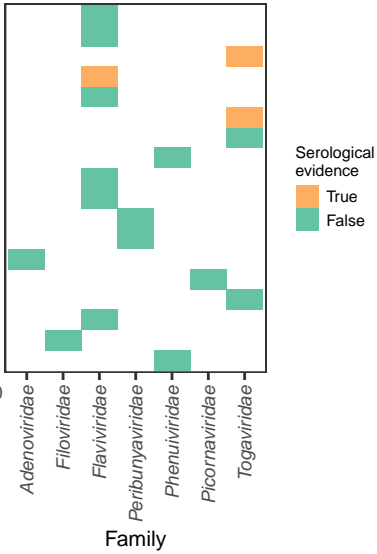

Supplement: pbio.3001390.s007.pdf [file pbio.3001390.s007.pdf]
